# Supplementary material for: Sodium channel-inhibiting drugs and cancer-specific survival: a population-based study of electronic primary care data
Source: bioRxiv or medRxiv preprint supplement (doi:10.1101/2022.12.16.22283520), 2023-01-18
Supplement: Supplementary file [file media-1.pdf]

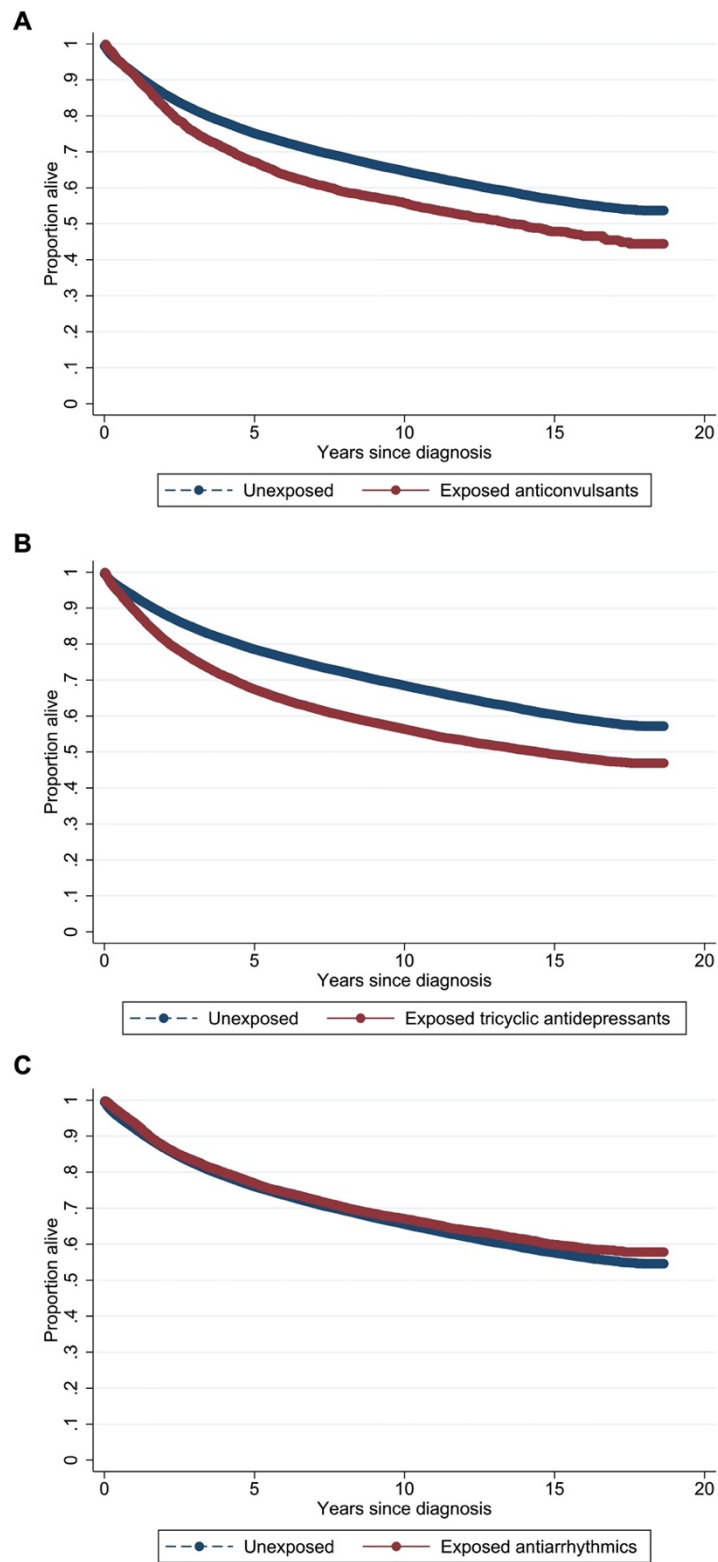

**Supplementary Figure 1.** Simon-Makuch survival curves for unexposed cancer patients and those ever exposed to VGSC-inhibiting anticonvulsant (A), tricyclic antidepressant (B) and antiarrhythmic (C) drugs in Scenario 3.

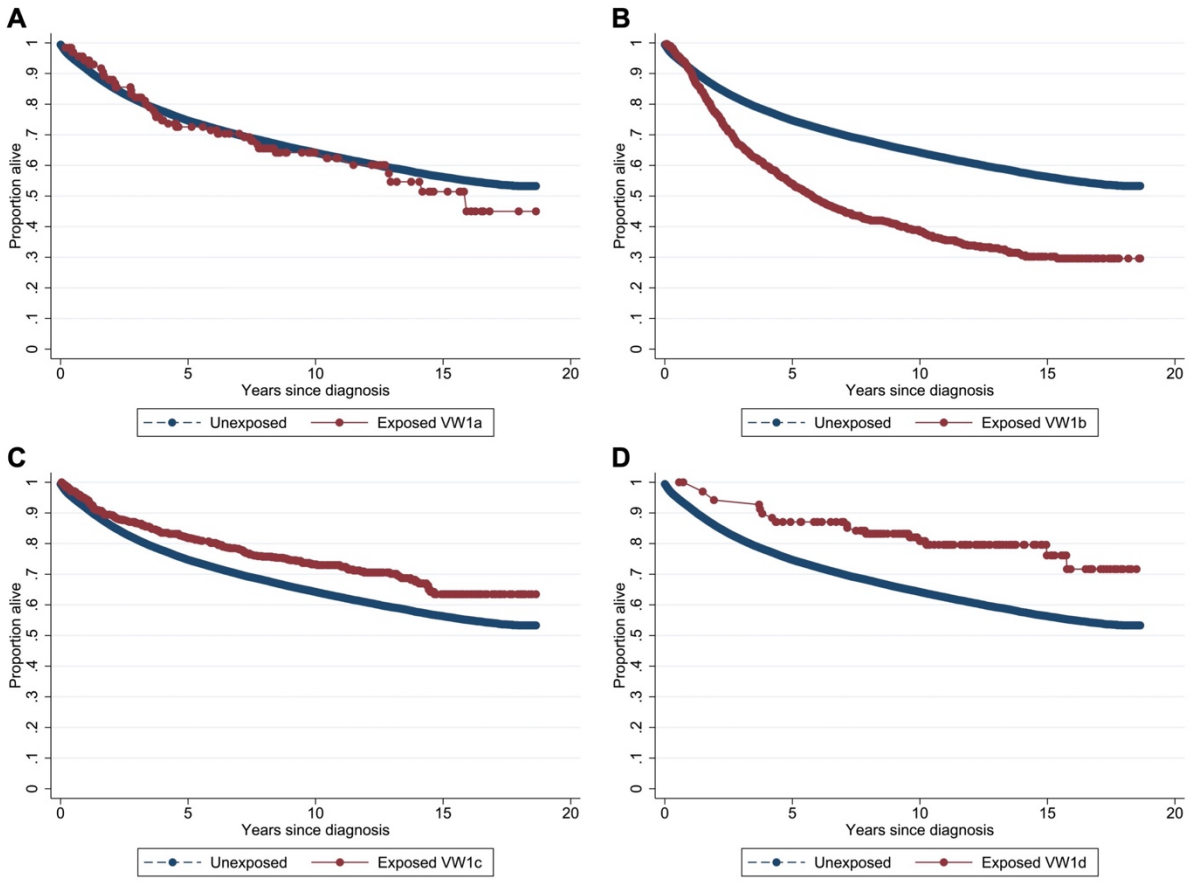

**Supplementary Figure 2.** Simon-Makuch survival curve for unexposed cancer patients and those ever exposed to Vaughan-Williams Class 1a (A), 1b (B), 1c (C) and 1d (D) drugs in Scenario 3.

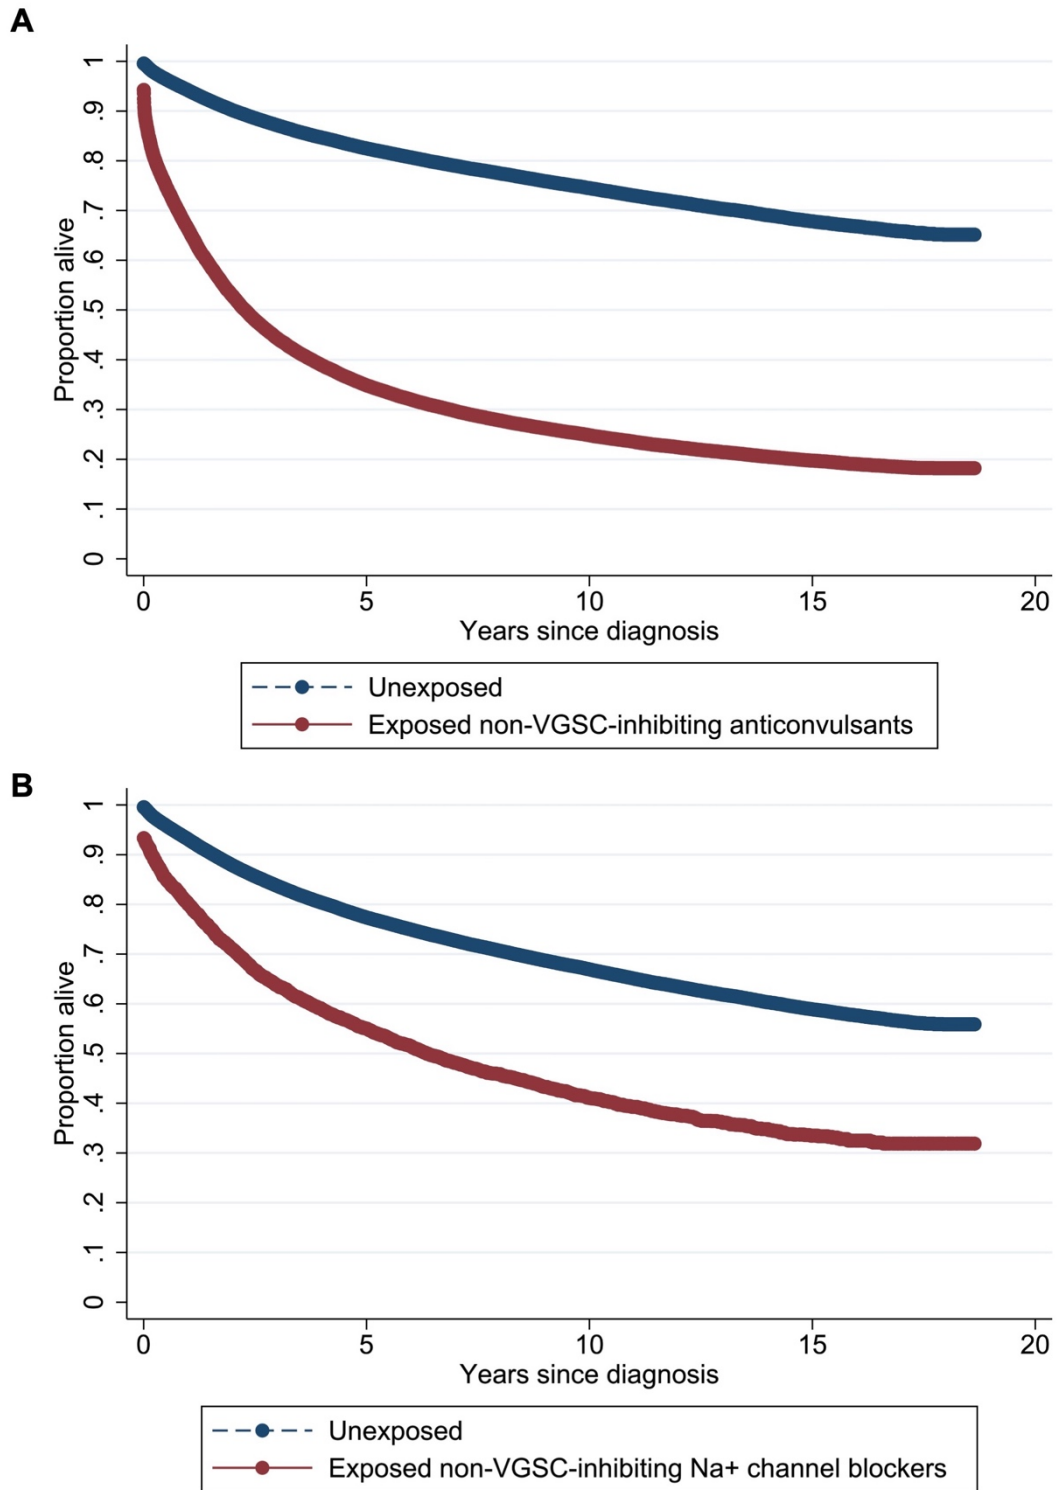

**Supplementary Figure 3.** Simon-Makuch survival curve for unexposed cancer patients and those ever exposed to non-VGSC-inhibiting anticonvulsants (A) and non-VGSC-inhibiting Na<sup>+</sup> channel blockers (B) in Scenario 3.

**Supplementary Table 1. Drug groups and classifications used in this study.**

| <b>Drug</b>                         | <b>Classification</b>   | <b>Vaughan Williams Classification<sup>a</sup></b> |
|-------------------------------------|-------------------------|----------------------------------------------------|
| <b>A. VGSC inhibitors</b>           |                         |                                                    |
| Articaine                           | Amide local anaesthetic |                                                    |
| Bupivacaine                         | Amide local anaesthetic |                                                    |
| Cinchocaine                         | Amide local anaesthetic |                                                    |
| Etidocaine                          | Amide local anaesthetic |                                                    |
| Levobupivacaine                     | Amide local anaesthetic |                                                    |
| Lidocaine                           | Amide local anaesthetic | 1b                                                 |
| Mepivacaine                         | Amide local anaesthetic |                                                    |
| Prilocaine                          | Amide local anaesthetic |                                                    |
| Ropivacaine                         | Amide local anaesthetic |                                                    |
| Trimecaine                          | Amide local anaesthetic |                                                    |
| Ranolazine                          | Antiarrhythmic          | 1d                                                 |
| Ajmaline                            | Antiarrhythmic          | 1a                                                 |
| Amiodarone                          | Antiarrhythmic          | 3                                                  |
| Aprindine                           | Antiarrhythmic          | 1b                                                 |
| Disopyramide                        | Antiarrhythmic          | 1a                                                 |
| Dronedarone                         | Antiarrhythmic          | 3                                                  |
| Encainide                           | Antiarrhythmic          | 1c                                                 |
| Flecainide                          | Antiarrhythmic          | 1c                                                 |
| Mexiletine                          | Antiarrhythmic          | 1b                                                 |
| Moricizine/Moricizine hydrochloride | Antiarrhythmic          | 1c                                                 |
| Pilsicainide                        | Antiarrhythmic          | 1c                                                 |
| Procainamide                        | Antiarrhythmic          | 1a                                                 |
| Propafenone                         | Antiarrhythmic          | 1c                                                 |
| Quinidine                           | Antiarrhythmic          | 1a                                                 |
| Tocainide                           | Antiarrhythmic          | 1b                                                 |

|                         |                          |    |
|-------------------------|--------------------------|----|
| Carvedilol              | Antiarrhythmic           | 2  |
| Labetalol               | Antiarrhythmic           | 2  |
| Oxprenolol              | Antiarrhythmic           | 2  |
| Propranolol             | Antiarrhythmic           | 2  |
| Esmolol                 | Antiarrhythmic           | 2  |
| Carbamazepine           | Anticonvulsant           |    |
| Eslicarbazepine         | Anticonvulsant           |    |
| Eslicarbazepine acetate | Anticonvulsant           |    |
| Ethotoin                | Anticonvulsant           |    |
| Fosphenytoin            | Anticonvulsant           |    |
| Lacosamide              | Anticonvulsant           |    |
| Lamotrigine             | Anticonvulsant           |    |
| Oxcarbazepine           | Anticonvulsant           |    |
| Phenytoin               | Anticonvulsant           | 1b |
| Rufinamide              | Anticonvulsant           |    |
| Sodium Valproate        | Anticonvulsant           |    |
| Topiramate              | Anticonvulsant           |    |
| Valproic acid           | Anticonvulsant           |    |
| Zonisamide              | Anticonvulsant           |    |
| Benzocaine              | Ester local anaesthetic  |    |
| Procaine                | Ester local anaesthetic  |    |
| Tetracaine              | Ester local anaesthetic  |    |
| Riluzole                | ALS treatment            |    |
| Amitriptyline           | Tricyclic antidepressant |    |
| Desipramine             | Tricyclic antidepressant |    |
| Duloxetine              | Tricyclic antidepressant |    |
| Fluoxetine              | Tricyclic antidepressant |    |
| Imipramine              | Tricyclic antidepressant |    |
| Maprotiline             | Tricyclic antidepressant |    |

|                                                   |                                          |  |
|---------------------------------------------------|------------------------------------------|--|
| Nortriptyline                                     | Tricyclic antidepressant                 |  |
| <b>A. Non-VGSC Na<sup>+</sup> channel blocker</b> |                                          |  |
| Amiloride                                         | ENaC inhibitor                           |  |
| Triamterene                                       | ENaC inhibitor                           |  |
| <b>B. Non-VGSC-inhibiting anticonvulsants</b>     |                                          |  |
| Perampanel                                        | AMPA receptor non-competitive antagonist |  |
| Stiripentol                                       | Aromatic allylic alcohol                 |  |
| Phenobarbital                                     | Barbiturate                              |  |
| Primidone                                         | Barbiturate                              |  |
| Clobazam                                          | Benzodiazepine                           |  |
| Clonazepam                                        | Benzodiazepine                           |  |
| Diazepam                                          | Benzodiazepine                           |  |
| Lorazepam                                         | Benzodiazepine                           |  |
| Midazolam                                         | Benzodiazepine                           |  |
| Ethosuximide                                      | Ca <sup>2+</sup> channel inhibitor       |  |
| Gabapentin                                        | Ca <sup>2+</sup> channel inhibitor       |  |
| Pregabalin                                        | Ca <sup>2+</sup> channel inhibitor       |  |
| Acetazolamide                                     | Carbonic anhydrase inhibitor             |  |
| Tiagabine                                         | GABA reuptake inhibitor                  |  |
| Vigabatrin                                        | GABA reuptake inhibitor                  |  |
| Brivaracetam                                      | SV2A inhibitor                           |  |
| Levetiracetam                                     | SV2A inhibitor                           |  |

<sup>a</sup>According to (37,38).

**Supplementary Table 2.** Characteristics of the participants stratified by exposure status.

|                                | <b>A VGSC-inhibitor prescription (any at any time exc anaesthetics)</b><br><b>(n=53724)</b> | <b>No VGSC-inhibitor prescriptions</b><br><b>(n=79272)</b> | <b>Total</b><br><b>(n=132996)</b> | <b>p-value</b> |
|--------------------------------|---------------------------------------------------------------------------------------------|------------------------------------------------------------|-----------------------------------|----------------|
| <b>Sex, n (%)</b>              |                                                                                             |                                                            |                                   |                |
| Male                           | 22531 (41.9)                                                                                | 41402 (52.2)                                               | 63933 (48.1)                      | <0.001         |
| Female                         | 31193 (58.1)                                                                                | 37870 (47.8)                                               | 69063 (51.9)                      |                |
| <b>Age at diagnosis, years</b> |                                                                                             |                                                            |                                   |                |
| Mean (SD)                      | 65.9 (13.0)                                                                                 | 68.0 (13.3)                                                | 67.1 (13.2)                       | <0.001         |
| <b>Ethnicity, n (%)</b>        |                                                                                             |                                                            |                                   |                |
| White                          | 50495 (94.0)                                                                                | 72056 (90.9)                                               | 122551 (92.1)                     | <0.001         |
| Mixed/Multiple ethnic groups   | 161 (0.3)                                                                                   | 299 (0.4)                                                  | 460 (0.3)                         |                |
| Asian/Asian British            | 801 (1.5)                                                                                   | 1297 (1.6)                                                 | 2098 (1.6)                        |                |
| Black/Black British            | 733 (1.4)                                                                                   | 1597 (2.0)                                                 | 2330 (1.8)                        |                |
| Other                          | 190 (0.4)                                                                                   | 336 (0.4)                                                  | 526 (0.4)                         |                |
|                                |                                                                                             |                                                            |                                   |                |

|                                             |              |              |              |        |
|---------------------------------------------|--------------|--------------|--------------|--------|
| Not recorded/know n                         | 1344 (2.5)   | 3687 (4.7)   | 5031 (3.8)   |        |
| <b>Index of Multiple Deprivation, n (%)</b> |              |              |              |        |
| Mean (SD)                                   | 9.2 (5.6)    | 9.0 (5.5)    | 9.1 (5.5)    | <0.001 |
| <b>Smoking status, n (%)</b>                |              |              |              |        |
| Heavy smoker                                | 1596 (3.0)   | 1648 (2.1)   | 3244 (2.4)   | <0.001 |
| Moderate smoker                             | 4503 (8.4)   | 5259 (6.6)   | 9762 (7.3)   |        |
| Light smoker                                | 1675 (3.1)   | 2156 (2.7)   | 3831 (2.9)   |        |
| Ex-smoker                                   | 16413 (30.6) | 23004 (29.0) | 39417 (29.6) |        |
| Non-smoker                                  | 28676 (53.4) | 44072 (55.6) | 72748 (54.7) |        |
| Not recorded/know n                         | 861 (1.6)    | 3133 (4.0)   | 3994 (3.0)   |        |
| <b>Alcohol intake, n (%)</b>                |              |              |              |        |
| Heavy drinker                               | 13656 (25.4) | 20565 (25.9) | 34221 (25.7) | <0.001 |
| Moderate drinker                            | 3421 (6.4)   | 5003 (6.3)   | 8424 (6.3)   |        |
| Light drinker                               | 11829 (22.0) | 16231 (20.5) | 28060 (21.1) |        |



|                                 |              |              |              |        |
|---------------------------------|--------------|--------------|--------------|--------|
| Non drinker                     | 9001 (16.8)  | 10442 (13.2) | 19443 (14.6) |        |
| Not recorded/known              | 15817 (29.4) | 27031 (34.1) | 42848 (32.2) |        |
| <b>BMI category, n (%)</b>      |              |              |              |        |
| Overweight/Obese                | 32166 (59.9) | 42432 (53.5) | 74598 (56.1) | <0.001 |
| Normal range                    | 15526 (28.9) | 24137 (30.4) | 39663 (29.8) |        |
| Underweight                     | 2345 (4.4)   | 3598 (4.5)   | 5943 (4.5)   |        |
| Not recorded/known              | 3687 (6.9)   | 9105 (11.5)  | 12792 (9.6)  |        |
| <b>Physical activity, n (%)</b> |              |              |              |        |
| Very active                     | 2634 (4.9)   | 4173 (5.3)   | 6807 (5.1)   | <0.001 |
| Moderately active               | 18614 (34.6) | 25806 (32.6) | 44420 (33.4) |        |
| Inactive                        | 7551 (14.1)  | 8179 (10.3)  | 15730 (11.8) |        |
| Not recorded/known              | 24925 (46.4) | 41114 (51.9) | 66039 (49.7) |        |
| <b>Type of cancer, n (%)</b>    |              |              |              |        |
| Breast                          | 27106 (50.5) | 32422 (40.9) | 59528 (44.8) | <0.001 |

|                                                     |                     |                     |                     |                  |
|-----------------------------------------------------|---------------------|---------------------|---------------------|------------------|
| Bowel                                               | 8435 (15.7)         | 14432 (18.2)        | 22867 (17.2)        |                  |
| Prostate                                            | 18183 (33.8)        | 32418 (40.9)        | 50601 (38.0)        |                  |
| <b>Total CCI score</b>                              |                     |                     |                     |                  |
| Mean (SD)                                           | 6.1 (2.8)           | 5.9 (2.7)           | 6.0 (2.7)           | <0.001           |
| <b>VGSC-inhibitor indication<sup>a</sup>, n (%)</b> |                     |                     |                     |                  |
| Epilepsy                                            | 1915 (3.6)          | 449 (0.6)           | 2364 (1.8)          | <0.001           |
| Cardiac arrhythmia                                  | 9646 (18.0)         | 9791 (12.4)         | 19437 (14.6)        | <0.001           |
| Amyotrophic lateral sclerosis                       | 0 (0.0)             | 0 (0.0)             | 0 (0.0)             | -                |
| Neuropathic pain/painful neuropathy                 | 9860 (18.4)         | 7271 (9.2)          | 17131 (12.9)        | <0.001           |
| <b>≥1 of above, n (%)</b>                           | <b>18744 (34.9)</b> | <b>16048 (20.2)</b> | <b>34792 (26.2)</b> | <b>&lt;0.001</b> |

<sup>a</sup> not mutually exclusive

VGSC, voltage gated sodium channel; SD, standard deviation; BMI, body mass index; CCI, Charlson Comorbidity Index score.

**Supplementary Table 3.** Characteristics of the 'ever' exposed group stratified by timing of exposure relative to their cancer diagnosis.

|                                    | <b>Before only<br/>(n=14,157)</b> | <b>Before and<br/>after<br/>(n=17,264)</b> | <b>After only<br/>(n=22,303)</b> | <b>VGSC inhibitor<br/>prescription<br/>(any at any<br/>time excluding<br/>local<br/>anaesthetics)<br/><br/>(n=53,724)</b> |
|------------------------------------|-----------------------------------|--------------------------------------------|----------------------------------|---------------------------------------------------------------------------------------------------------------------------|
| <b>Sex, n (%)</b>                  |                                   |                                            |                                  |                                                                                                                           |
| Male                               | 6049 (42.7)                       | 6325 (36.6)                                | 10157 (45.5)                     | 22531 (41.9)                                                                                                              |
| Female                             | 8108 (57.3)                       | 10939 (63.4)                               | 12146 (54.5)                     | 31193 (58.1)                                                                                                              |
| <b>Age at diagnosis,<br/>years</b> |                                   |                                            |                                  |                                                                                                                           |
| Mean (SD)                          | 68.6 (13.4)                       | 65.7 (12.9)                                | 64.3 (12.5)                      | 65.9 (13.0)                                                                                                               |
| <b>Ethnicity, n (%)</b>            |                                   |                                            |                                  |                                                                                                                           |
| White                              | 13189 (93.2)                      | 16366 (94.8)                               | 20940 (93.9)                     | 50495 (94.0)                                                                                                              |
| Mixed/Multiple<br>ethnic groups    | 35 (0.2)                          | 47 (0.3)                                   | 79 (0.4)                         | 161 (0.3)                                                                                                                 |
| Asian/Asian British                | 172 (1.2)                         | 252 (1.5)                                  | 377 (1.7)                        | 801 (1.5)                                                                                                                 |
| Black/Black British                | 169 (1.2)                         | 186 (1.1)                                  | 378 (1.7)                        | 733 (1.4)                                                                                                                 |
| Other                              | 48 (0.3)                          | 54 (0.3)                                   | 88 (0.4)                         | 190 (0.4)                                                                                                                 |
| Not recorded/known                 | 544 (3.8)                         | 359 (2.1)                                  | 441 (2.0)                        | 1344 (2.5)                                                                                                                |

|                                             |             |             |              |              |
|---------------------------------------------|-------------|-------------|--------------|--------------|
| <b>Index of Multiple Deprivation, n (%)</b> |             |             |              |              |
| Mean (SD)                                   | 9.2 (5.5)   | 9.5 (5.7)   | 9.0 (5.5)    | 9.2 (5.6)    |
| <b>Smoking status, n (%)</b>                |             |             |              |              |
| Heavy smoker                                | 373 (2.6)   | 561 (3.2)   | 662 (3.0)    | 1596 (3.0)   |
| Moderate smoker                             | 1139 (8.0)  | 1554 (9.0)  | 1810 (8.1)   | 4503 (8.4)   |
| Light smoker                                | 437 (3.1)   | 520 (3.0)   | 718 (3.2)    | 1675 (3.1)   |
| Ex-smoker                                   | 4336 (30.6) | 5362 (31.1) | 6715 (30.1)  | 16413 (30.6) |
| Non-smoker                                  | 7562 (53.4) | 9020 (52.2) | 12094 (54.2) | 28676 (53.4) |
| Not recorded/known                          | 310 (2.2)   | 247 (1.4)   | 304 (1.4)    | 861 (1.6)    |
| <b>Alcohol intake, n (%)</b>                |             |             |              |              |
| Heavy drinker                               | 3467 (24.5) | 4030 (23.3) | 6159 (27.6)  | 13656 (25.4) |
| Moderate drinker                            | 929 (6.6)   | 1036 (6.0)  | 1456 (6.5)   | 3421 (6.4)   |
| Light drinker                               | 3153 (22.3) | 3879 (22.5) | 4797 (21.5)  | 11829 (22.0) |
| Non drinker                                 | 2436 (17.2) | 3404 (19.7) | 3161 (14.2)  | 9001 (16.8)  |
| Not recorded/known                          | 4172 (29.5) | 4915 (28.5) | 6730 (30.2)  | 15817 (29.4) |
| <b>BMI category, n (%)</b>                  |             |             |              |              |

|                                                                    |             |              |              |              |
|--------------------------------------------------------------------|-------------|--------------|--------------|--------------|
| Overweight/Obese                                                   | 7990 (56.4) | 10699 (62.0) | 13477 (60.4) | 32166 (59.9) |
| Normal range                                                       | 4267 (30.1) | 4734 (27.4)  | 6525 (29.3)  | 15526 (28.9) |
| Underweight                                                        | 764 (5.4)   | 728 (4.2)    | 853 (3.8)    | 2345 (4.4)   |
| Not recorded/known                                                 | 1136 (8.0)  | 1103 (6.4)   | 1448 (6.5)   | 3687 (6.9)   |
| <b>Physical activity, n (%)</b>                                    |             |              |              |              |
| Very active                                                        | 615 (4.3)   | 752 (4.4)    | 1267 (5.7)   | 2634 (4.9)   |
| Moderately active                                                  | 4497 (31.8) | 5896 (34.2)  | 8221 (36.9)  | 18614 (34.6) |
| Inactive                                                           | 1785 (12.6) | 2816 (16.3)  | 2950 (13.2)  | 7551 (14.1)  |
| Not recorded/known                                                 | 7260 (51.3) | 7800 (45.2)  | 9865 (44.2)  | 24925 (46.4) |
| <b>Type of cancer, n (%)</b>                                       |             |              |              |              |
| Breast                                                             | 6766 (47.8) | 9642 (55.9)  | 10698 (48.0) | 27106 (50.5) |
| Bowel                                                              | 2531 (17.9) | 2472 (14.3)  | 3432 (15.4)  | 8435 (15.7)  |
| Prostate                                                           | 4860 (34.3) | 5150 (29.8)  | 8173 (36.6)  | 18183 (33.8) |
| <b>Total CCI score</b>                                             |             |              |              |              |
| Mean (SD)                                                          | 6.3 (2.8)   | 6.1 (2.8)    | 5.9 (2.8)    | 6.1 (2.8)    |
| <b>Diagnosis of a VGSC inhibitor indication<sup>a</sup>, n (%)</b> |             |              |              |              |

|                                               |             |              |              |              |
|-----------------------------------------------|-------------|--------------|--------------|--------------|
| Epilepsy                                      | 202 (1.4)   | 1271 (7.4)   | 442 (2.0)    | 1915 (3.6)   |
| Cardiac arrhythmia                            | 2611 (18.4) | 3362 (19.5)  | 3673 (16.5)  | 9646 (18.0)  |
| Amyotrophic lateral sclerosis                 | 0 (0.0)     | 0 (0.0)      | 0 (0.0)      | 0 (0.0)      |
| Neuropathic pain/painful neuropathy           | 2126 (15.0) | 3790 (22.0)  | 3944 (17.7)  | 9860 (18.4)  |
| <b>≥1 of above, n (%)</b>                     | 4400 (31.1) | 7199 (41.7)  | 7145 (32.0)  | 18744 (34.9) |
| <b>Died, n (%)</b>                            | 7800 (55.1) | 8119 (47.0)  | 10109 (45.3) | 26028 (48.4) |
| <b>Most common prescription 1<sup>a</sup></b> |             |              |              |              |
| Tricyclic antidepressant                      | 9312 (65.8) | 11495 (66.6) | 17793 (79.8) | 38600 (71.8) |
| Antiarrhythmic                                | 4023 (28.4) | 3828 (22.2)  | 3181 (14.3)  | 11032 (20.5) |
| Anticonvulsant                                | 822 (5.8)   | 1935 (11.2)  | 1305 (5.9)   | 4062 (7.6)   |
| Treatment for ALS                             | 0 (0.0)     | 6 (0.0)      | 24 (0.1)     | 30 (0.1)     |
| <b>Most common prescription 2<sup>b</sup></b> |             |              |              |              |
| Tricyclic antidepressant                      | 7887 (55.7) | 10831 (62.7) | 15187 (68.1) | 33905 (63.1) |
| Antiarrhythmic                                | 3604 (25.5) | 3726 (21.6)  | 2881 (12.9)  | 10211 (19.0) |
| Amide local anaesthetic                       | 1905 (13.5) | 782 (4.5)    | 2951 (13.2)  | 5638 (10.5)  |

|                                           |                    |                    |                    |                 |
|-------------------------------------------|--------------------|--------------------|--------------------|-----------------|
| Anticonvulsant                            | 708 (5.0)          | 1907 (11.0)        | 1191 (5.3)         | 3806 (7.1)      |
| Ester local anaesthetic                   | 53 (0.4)           | 12 (0.1)           | 71 (0.3)           | 136 (0.3)       |
| Treatment for ALS                         | 0 (0.0)            | 6 (0.0)            | 22 (0.1)           | 28 (0.1)        |
| <b>Length of exposure (days)</b>          |                    |                    |                    |                 |
| Mean (SD)                                 | 2095.1<br>(2220.1) | 4889.9<br>(2473.2) | 1912.7<br>(2077.5) | 2917.5 (2627.5) |
| < 6 months, n (%)                         | 3239 (22.9)        | 40 (0.2)           | 4589 (20.6)        | 7868 (14.6)     |
| ≥ 6 months, n (%)                         | 10918 (77.1)       | 17224 (99.8)       | 17714 (79.4)       | 45856 (85.4)    |
| <b>Recent exposure<sup>c</sup>, n (%)</b> | 1017 (7.2)         | 8580 (49.7)        | 0 (0.0)            | 9597 (17.9)     |

<sup>a</sup> excluding local anaesthetics.

<sup>b</sup> including local anaesthetics.

<sup>c</sup> ≥2 prescriptions relating to one of the VGSC-inhibiting drugs within 2 years before the date of the cancer diagnosis, including at least one within 6 months before.

**Supplementary Table 4.** Deaths stratified by exposure to non-VGSC-inhibiting anticonvulsants and non-VGSC-inhibiting Na<sup>+</sup> channel blockers.

|                                            | <b>A VGSC-inhibitor prescription (any other than Amide or Ester local anaesthetics at any time) (n=53724)</b> | <b>No VGSC-inhibitor prescriptions (except Amide or Ester local anaesthetics) (n=79272)</b> | <b>A non-VGSC-inhibiting anticonvulsant prescription (any at any time) (n=46017)</b> | <b>No exposure to a non-VGSC-inhibiting anticonvulsant prescription (n=86979)</b> | <b>Non-VGSC-inhibiting Na<sup>+</sup> channel blocker prescription (any at any time) (n=9256)</b> | <b>No exposure to a non-VGSC-inhibiting Na<sup>+</sup> channel blocker prescription (n=123740)</b> |
|--------------------------------------------|---------------------------------------------------------------------------------------------------------------|---------------------------------------------------------------------------------------------|--------------------------------------------------------------------------------------|-----------------------------------------------------------------------------------|---------------------------------------------------------------------------------------------------|----------------------------------------------------------------------------------------------------|
| Died (any cause)                           | 26028<br>(48.4)                                                                                               | 40932<br>(51.6)                                                                             | 25284<br>(54.9)                                                                      | 41676<br>(47.9)                                                                   | 6969<br>(75.3)                                                                                    | 59991<br>(48.5)                                                                                    |
| Died with any cancer as underlying cause   | 15933<br>(29.7)                                                                                               | 26104<br>(32.9)                                                                             | 17987<br>(39.1)                                                                      | 24050<br>(27.7)                                                                   | 3601<br>(38.9)                                                                                    | 38436<br>(31.1)                                                                                    |
| Died with any cancer as contributory cause | 18598<br>(34.6)                                                                                               | 30492<br>(38.5)                                                                             | 20003<br>(43.5)                                                                      | 29087<br>(33.4)                                                                   | 4540<br>(49.0)                                                                                    | 44550<br>(36.0)                                                                                    |
| Died with index cancer as underlying cause | 12282<br>(22.9)                                                                                               | 20443<br>(25.8)                                                                             | 13925<br>(30.3)                                                                      | 18800<br>(21.6)                                                                   | 2842<br>(30.7)                                                                                    | 29883<br>(24.1)                                                                                    |



|                                              |                 |                 |                 |                 |                |                 |
|----------------------------------------------|-----------------|-----------------|-----------------|-----------------|----------------|-----------------|
| Died with index cancer as contributory cause | 15256<br>(28.4) | 25482<br>(32.1) | 16451<br>(35.7) | 24287<br>(27.9) | 3834<br>(41.4) | 36904<br>(29.8) |
|----------------------------------------------|-----------------|-----------------|-----------------|-----------------|----------------|-----------------|

**Supplementary Table 5.** Estimates of the relationship between exposure to non-VGSC-inhibiting drugs, subdivided by type, and cancer-specific mortality (empty cells indicate that analysis was not permitted due to low numbers).

| Non-VGSC-inhibiting anticonvulsants drug groups | Exposed*<br>(n=46017),<br>n (%) | HR (95% CI)                  | HR (95% CI)                  | HR (95% CI)                  |
|-------------------------------------------------|---------------------------------|------------------------------|------------------------------|------------------------------|
|                                                 |                                 | p-value<br>Scenario 1        | p-value<br>Scenario 2        | p-value<br>Scenario 3        |
| <i>Ever use</i>                                 |                                 |                              |                              |                              |
| AMPA receptor non-competitive antagonist        | 4 (0.1)                         | -                            | -                            | -                            |
| Aromatic allylic alcohol                        | 0 (0.0)                         | -                            | -                            | -                            |
| Barbiturate                                     | 469 (1.0)                       | 1.39 (1.19, 1.63)<br>p<0.001 | 1.28 (1.07, 1.52) p=0.01     | 1.42 (1.19, 1.69)<br>p<0.001 |
| Benzodiazepine                                  | 37696 (81.9)                    | 3.01 (2.95, 3.07)<br>p<0.001 | 3.73 (3.65, 3.81)<br>p<0.001 | 4.91 (4.80, 5.02)<br>p<0.001 |
| Calcium channel inhibitor                       | 11643 (21.7)                    | 2.19 (2.12, 2.26)<br>p<0.001 | 2.27 (2.19, 2.34)<br>p<0.001 | 2.80 (2.71, 2.90)<br>p<0.001 |
| Carbonic anhydrase inhibitor                    | 14274 (31.0)                    | 0.92 (0.79, 1.06) p=0.25     | 0.93 (0.76, 1.13) p=0.46     | 1.25 (1.02, 1.53) p=0.03     |
| GABA reuptake inhibitor                         | 23 (0.1)                        | -                            | -                            | -                            |
| SV2A inhibitor                                  | 620 (1.4)                       | 2.98 (2.63, 3.38)<br>p<0.001 | 3.03 (2.67, 3.44)<br>p<0.001 | 3.75 (3.30, 4.25)<br>p<0.001 |
| <i>Recent use</i>                               |                                 |                              |                              |                              |

|                                                |            |                              |                              |                              |
|------------------------------------------------|------------|------------------------------|------------------------------|------------------------------|
| AMPA receptor non-competitive antagonist       | 0 (0.0)    | -                            | -                            | -                            |
| Aromatic allylic alcohol                       | 0 (0.0)    | -                            | -                            | -                            |
| Barbiturate                                    | 208 (0.5)  | 1.44 (1.16, 1.78)<br>p<0.001 | 1.37 (1.10, 1.71)<br>p<0.001 | 1.46 (1.18, 1.82)<br>p<0.001 |
| Benzodiazepine                                 | 2686 (5.8) | 1.46 (1.37, 1.56)<br>p<0.001 | 1.34 (1.25, 1.44)<br>p<0.001 | 1.51 (1.41, 1.62)<br>p<0.001 |
| Calcium channel inhibitor                      | 902 (2.0)  | 1.12 (0.99, 1.26) p=0.08     | 1.06 (0.93, 1.21) p=0.38     | 1.20 (1.05, 1.37) p=0.01     |
| Carbonic anhydrase inhibitor                   | 43 (0.1)   | -                            | -                            | -                            |
| GABA reuptake inhibitor                        | 0 (0.0)    | -                            | -                            | -                            |
| SV2A inhibitor                                 | 54 (0.1)   | -                            | -                            | -                            |
| <i>Most common VGSC-inhibitor prescription</i> |            |                              |                              |                              |
| AMPA receptor non-competitive antagonist       | 0 (0.0)    | -                            | -                            | -                            |
| Aromatic allylic alcohol                       | 0 (0.0)    | -                            | -                            | -                            |
| Barbiturate                                    | 348 (0.8)  | 1.43 (1.20, 1.71)<br>p<0.001 | 1.30 (1.07, 1.59) p=0.01     | 1.40 (1.15, 1.71)<br>p<0.001 |

|                              |                 |                                 |                                 |                                 |
|------------------------------|-----------------|---------------------------------|---------------------------------|---------------------------------|
| Benzodiazepine               | 32563<br>(70.8) | 3.06 (2.99,<br>3.12)<br>p<0.001 | 4.02 (3.93,<br>4.11)<br>p<0.001 | 5.11 (4.99,<br>5.23)<br>p<0.001 |
| Calcium channel inhibitor    | 12061<br>(26.2) | 2.22 (2.15,<br>2.30)<br>p<0.001 | 2.33 (2.24,<br>2.41)<br>p<0.001 | 2.80 (2.70,<br>2.90)<br>p<0.001 |
| Carbonic anhydrase inhibitor | 561 (1.2)       | 0.92 (0.78,<br>1.08) p=0.31     | 0.92 (0.72,<br>1.18) p=0.52     | 1.22 (0.96,<br>1.56) p=0.11     |
| GABA reuptake inhibitor      | 7 (0.0)         | -                               | -                               | -                               |
| SV2A inhibitor               | 477 (1.0)       | 3.16 (2.73,<br>3.65)<br>p<0.001 | 3.23 (2.79,<br>3.74)<br>p<0.001 | 4.00 (3.45,<br>4.63)<br>p<0.001 |

\*Figures in this column relate to the number of patients recorded as having at least some follow-up time considered as exposed to the drug group of interest in Scenario 1 for each definition (ever use, recent use, most common), as a percentage of the whole 'ever' exposed group. The number of patients with any person-time of follow-up considered as exposed for each drug group will be lower in Scenario 2, and fewer still in Scenario 3.
